# Supplementary material for: Catalytic Sonogashira couplings mediated by an amido pincer complex of palladium
Source: Royal Society of Chemistry journal article supplement (doi:10.1039/c3qi00086a), 2014-01-01
Supplement: c3qi00086a1.pdf [file c3qi00086a1.pdf]

Electronic supplementary information

for

**Catalytic Sonogashira Couplings Mediated by an Amido Pincer Complex of Palladium**

Yu-Ting Hung,<sup>†,||</sup> Ming-Tsz Chen,<sup>†</sup> Mei-Hui Huang,<sup>†</sup> Ting-Yin Kao,<sup>†</sup> Yu-Sheng Liu,<sup>†</sup> and  
Lan-Chang Liang<sup>\*,†,‡</sup>

<sup>†</sup>Department of Chemistry and Center for Nanoscience & Nanotechnology, National Sun Yat-sen University, Kaohsiung 80424, Taiwan, ROC

<sup>‡</sup>Department of Medicinal and Applied Chemistry, Kaohsiung Medical University, Kaohsiung 80708, Taiwan, ROC

E-mail: [lcliang@mail.nsysu.edu.tw](mailto:lcliang@mail.nsysu.edu.tw)

<sup>||</sup> Current address: Department of Chemistry & Biochemistry, University of Delaware, Newark, Delaware 19716, USA

**Contents**

- **Table S1.** Data of competition reactions to construct Figure 3
- **Table S2.** Data of competition reactions to construct Figure 4
- **Table S3.** Crystal data and structure refinement for **1b**
- **Figure S1.** Reaction profile (product yields versus time) of the model reaction (Table 1, entry 1) conducted with 5-fold diluted initial substrate concentrations.
- **Figure S2.** The <sup>1</sup>H (300 MHz) and <sup>13</sup>C{<sup>1</sup>H} (75 MHz) NMR spectra of 4-(phenylethynyl)acetophenone (**6e**) in CDCl<sub>3</sub> at room temperature
- **Figure S3.** The <sup>1</sup>H (300 MHz) and <sup>13</sup>C{<sup>1</sup>H} (75 MHz) NMR spectra of 4-(4-fluorophenylethynyl)acetophenone (**7e**) in CDCl<sub>3</sub> at room temperature
- **Figure S4.** The <sup>1</sup>H (300 MHz) and <sup>13</sup>C{<sup>1</sup>H} (75 MHz) NMR spectra of 1-(phenylethynyl)-4-(trifluoromethyl)benzene (**8a**) in CDCl<sub>3</sub> at room temperature
- **Figure S5.** The <sup>1</sup>H (300 MHz) and <sup>13</sup>C{<sup>1</sup>H} (75 MHz) NMR spectra of 4-(4-trifluoromethylphenylethynyl)acetophenone (**8e**) in CDCl<sub>3</sub> at room temperature
- **Figure S6.** The <sup>1</sup>H (300 MHz) and <sup>13</sup>C{<sup>1</sup>H} (75 MHz) NMR spectra of 3-(4-acetylphenylethynyl)thiophene (**9e**) in CDCl<sub>3</sub> at room temperature
- **Figure S7.** The <sup>1</sup>H (300 MHz) and <sup>13</sup>C{<sup>1</sup>H} (75 MHz) NMR spectra of 3-(2-pyridylethynyl)thiophene (**9g**) in CDCl<sub>3</sub> at room temperature

**Table S1.** Data derived from competition reactions to construct Figure 3

|          | $\sigma_p$ | yield | $\log(k/k_H)$ |
|----------|------------|-------|---------------|
| 4-OMe    | -0.27      | 3.9   | -0.28         |
| 4-Me     | -0.17      | 5.3   | -0.15         |
| H        | 0          | 7.5   | 0             |
| 4-C(O)Me | 0.50       | 17.5  | 0.37          |

**Table S2.** Data derived from competition reactions to construct Figure 4

|                   | $\sigma_p$ | yield | $\log(k/k_H)$ |
|-------------------|------------|-------|---------------|
| 4-OMe             | -0.27      | 6.7   | -0.38         |
| 4-Me              | -0.17      | 8.9   | -0.26         |
| H                 | 0          | 16.1  | 0             |
| 4-CF <sub>3</sub> | 0.54       | 40.9  | 0.40          |
| 4-CN              | 0.66       | 60.3  | 0.57          |

**Table S3.** Crystal data and structure refinement for **1b**.

|                                   |                                                        |                   |
|-----------------------------------|--------------------------------------------------------|-------------------|
| Identification code               | 5574                                                   |                   |
| Empirical formula                 | C <sub>24</sub> H <sub>36</sub> Cl N P <sub>2</sub> Pd |                   |
| Formula weight                    | 542.33                                                 |                   |
| Temperature                       | 200(2) K                                               |                   |
| Wavelength                        | 0.71073 Å                                              |                   |
| Crystal system                    | Monoclinic                                             |                   |
| Space group                       | P 21/c                                                 |                   |
| Unit cell dimensions              | a = 12.2739(3) Å                                       | α = 90°.          |
|                                   | b = 10.0375(2) Å                                       | β = 96.5990(10)°. |
|                                   | c = 20.7695(6) Å                                       | γ = 90°.          |
| Volume                            | 2541.83(11) Å <sup>3</sup>                             |                   |
| Z                                 | 4                                                      |                   |
| Density (calculated)              | 1.417 Mg/m <sup>3</sup>                                |                   |
| Absorption coefficient            | 0.972 mm <sup>-1</sup>                                 |                   |
| F(000)                            | 1120                                                   |                   |
| Crystal size                      | 0.18 x 0.13 x 0.05 mm <sup>3</sup>                     |                   |
| Theta range for data collection   | 2.26 to 25.35°.                                        |                   |
| Index ranges                      | -14 ≤ h ≤ 14, -12 ≤ k ≤ 10, -19 ≤ l ≤ 25               |                   |
| Reflections collected             | 16419                                                  |                   |
| Independent reflections           | 4643 [R(int) = 0.0729]                                 |                   |
| Completeness to theta = 25.35°    | 99.7 %                                                 |                   |
| Absorption correction             | Semi-empirical from equivalents                        |                   |
| Max. and min. transmission        | 0.9674 and 0.7601                                      |                   |
| Refinement method                 | Full-matrix least-squares on F <sup>2</sup>            |                   |
| Data / restraints / parameters    | 4643 / 0 / 262                                         |                   |
| Goodness-of-fit on F <sup>2</sup> | 1.004                                                  |                   |
| Final R indices [I > 2σ(I)]       | R1 = 0.0442, wR2 = 0.1039                              |                   |
| R indices (all data)              | R1 = 0.0723, wR2 = 0.1209                              |                   |
| Largest diff. peak and hole       | 0.688 and -1.126 e.Å <sup>-3</sup>                     |                   |

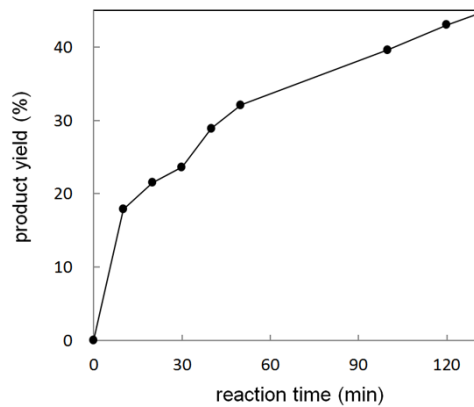

**Figure S1.** Reaction profile (product yields versus time) of the model reaction (Table 1, entry 1) conducted with 5-fold diluted initial substrate concentrations.

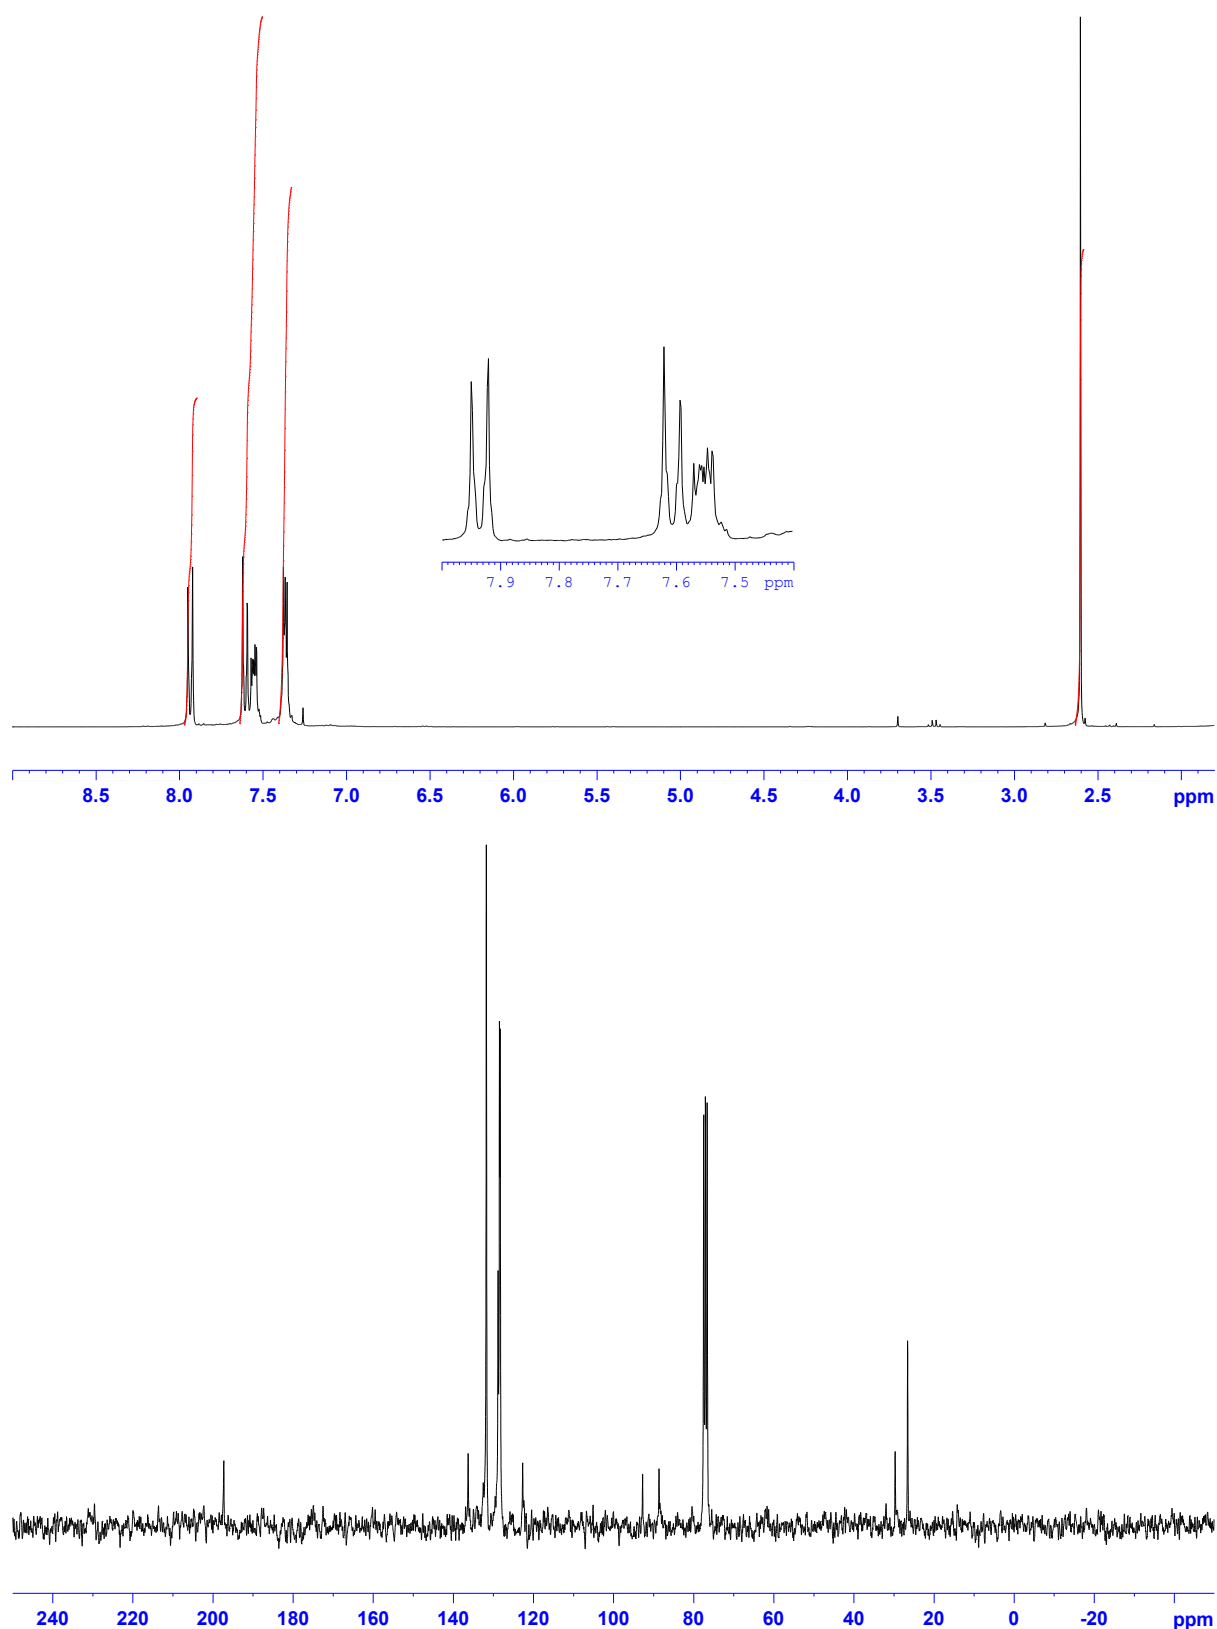

**Figure S2.** The <sup>1</sup>H (top, 300 MHz) and <sup>13</sup>C{<sup>1</sup>H} (bottom, 75 MHz) NMR spectra of 4-(phenylethynyl)acetophenone (**6e**) in CDCl<sub>3</sub> at room temperature

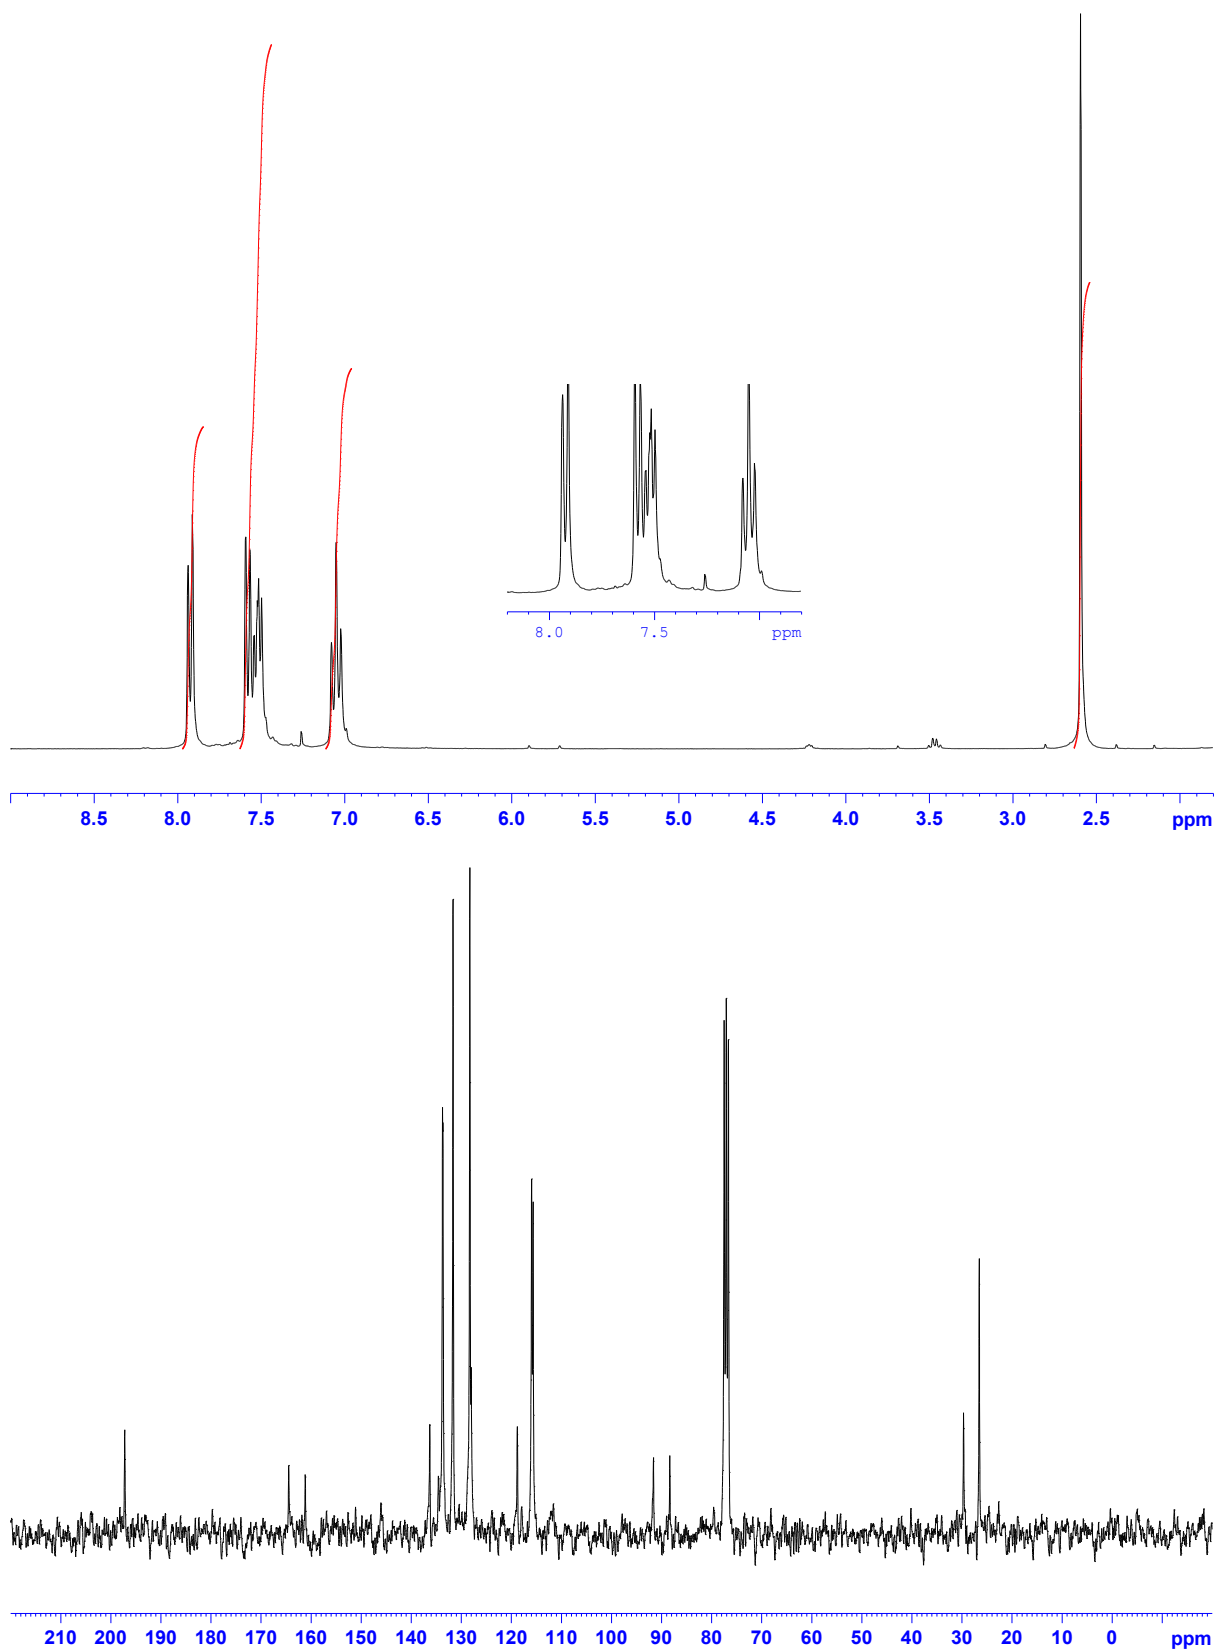

**Figure S3.** The <sup>1</sup>H (top, 300 MHz) and <sup>13</sup>C{<sup>1</sup>H} (bottom, 75 MHz) NMR spectra of 4-(4-fluorophenylethynyl)acetophenone (**7e**) in CDCl<sub>3</sub> at room temperature

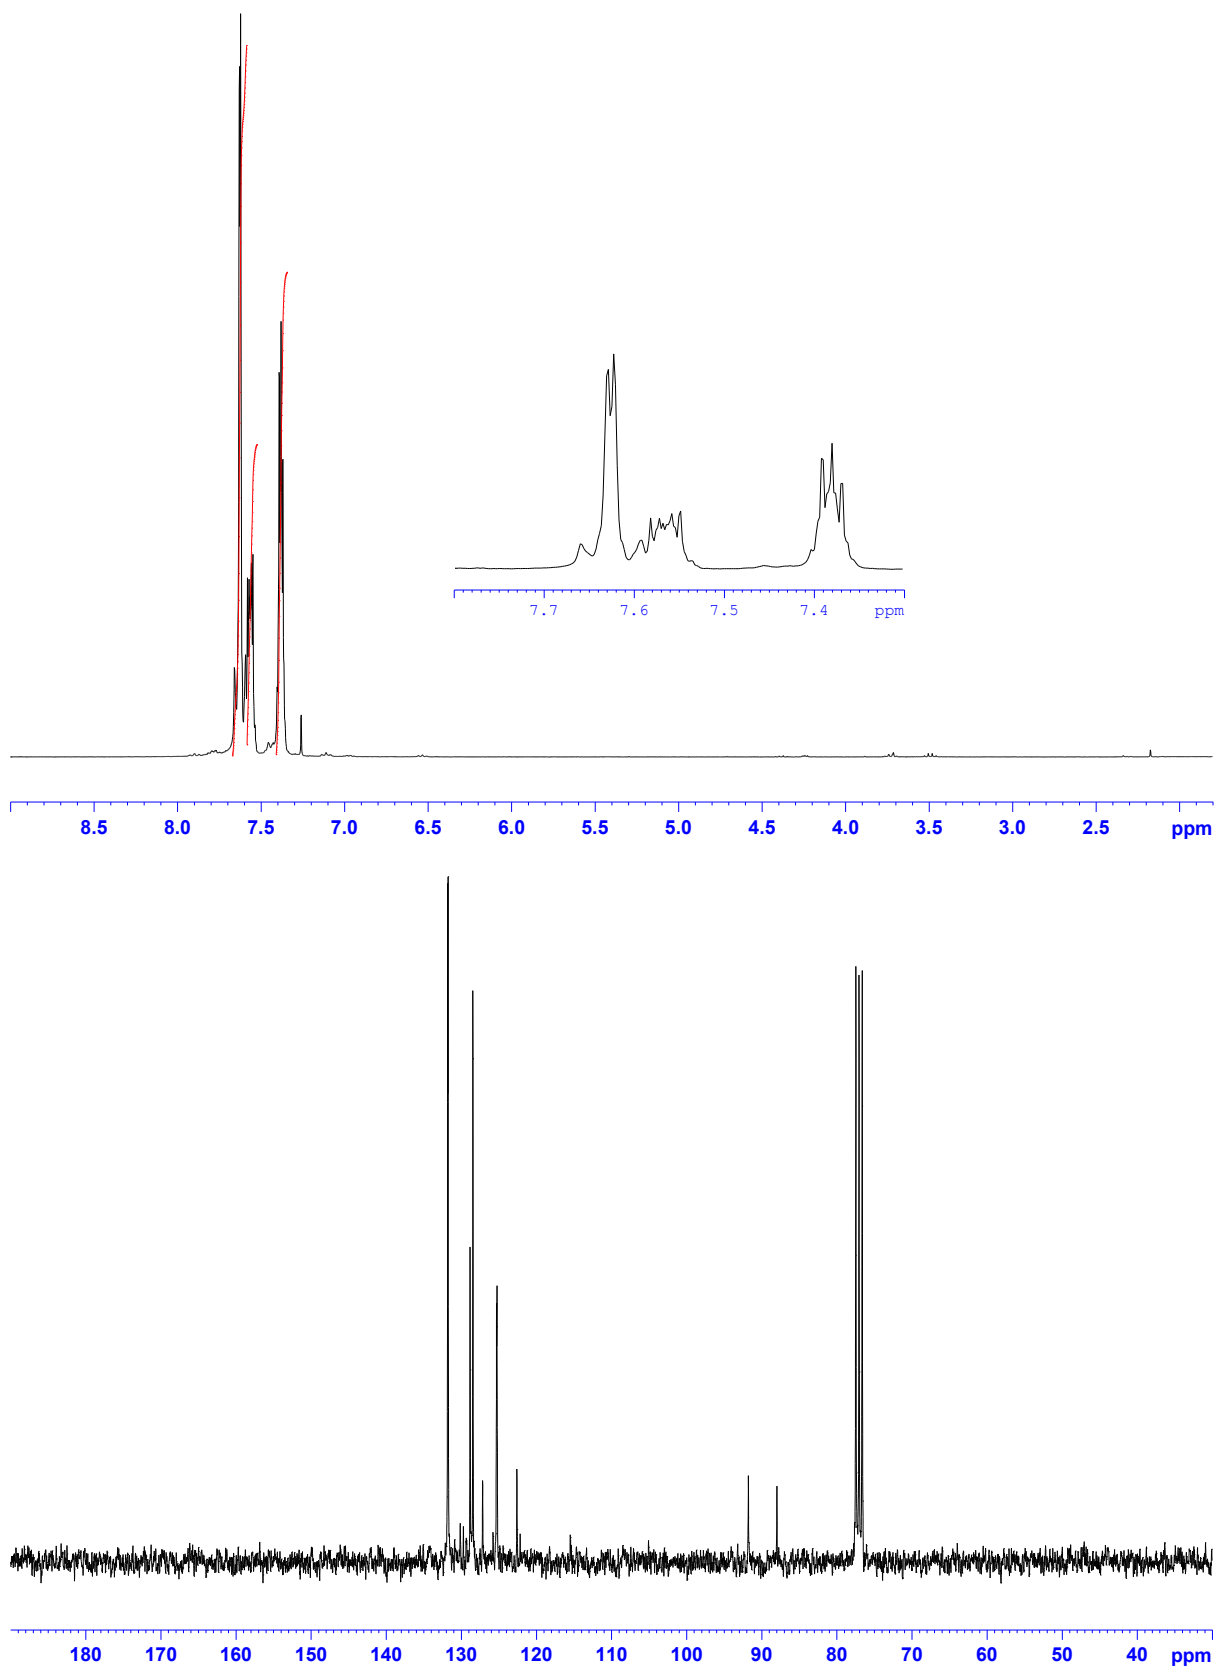

**Figure S4.** The  $^1\text{H}$  (top, 300 MHz) and  $^{13}\text{C}\{^1\text{H}\}$  (bottom, 75 MHz) NMR spectra of 1-(phenylethynyl)-4-(trifluoromethyl)benzene (**8a**) in  $\text{CDCl}_3$  at room temperature

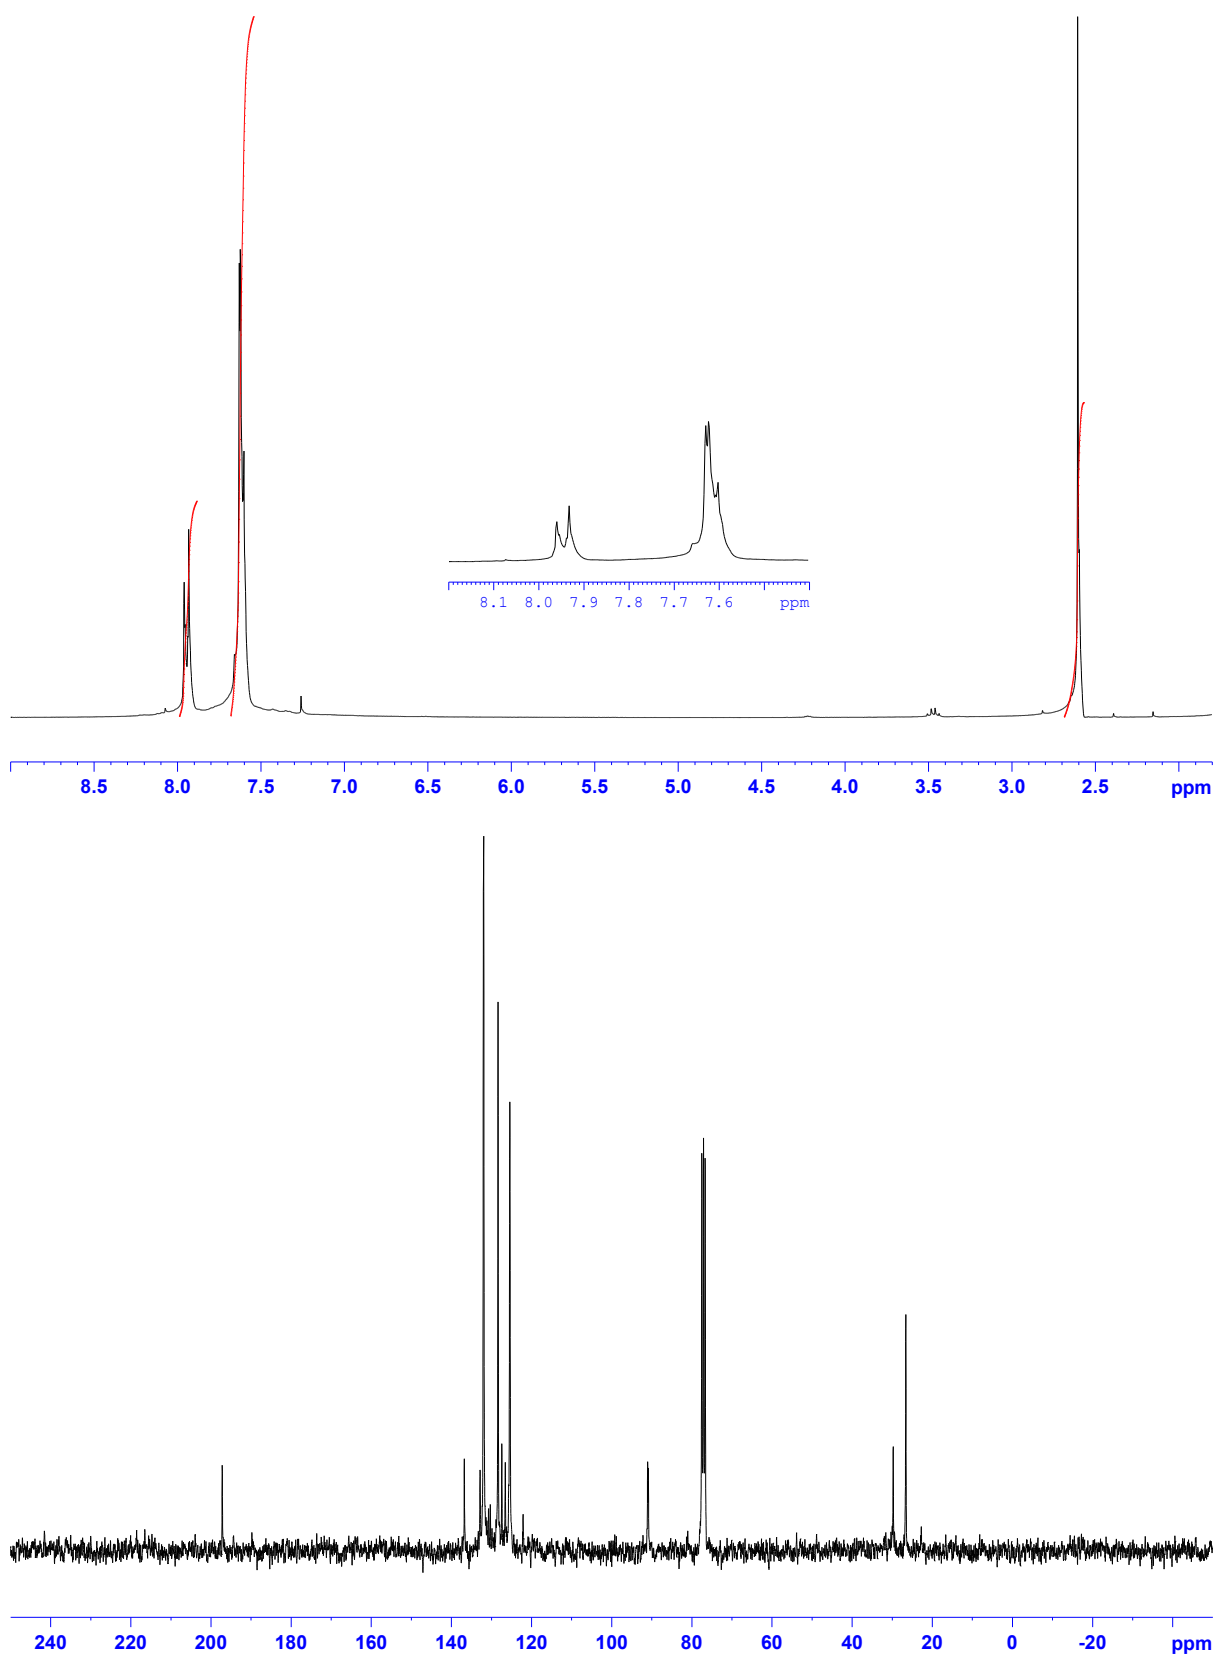

**Figure S5.** The  $^1\text{H}$  (top, 300 MHz) and  $^{13}\text{C}\{^1\text{H}\}$  (bottom, 75 MHz) NMR spectra of 4-(4-trifluoromethylphenylethynyl)acetophenone (**8e**) in  $\text{CDCl}_3$  at room temperature



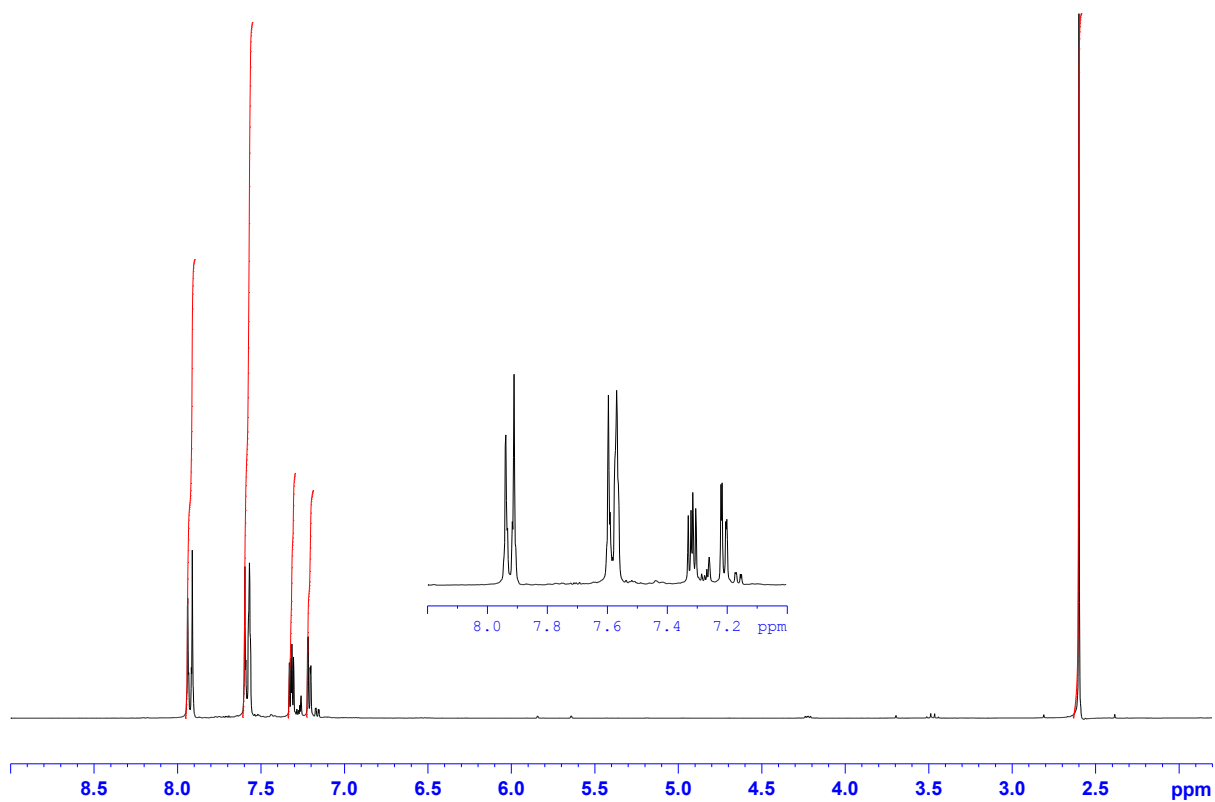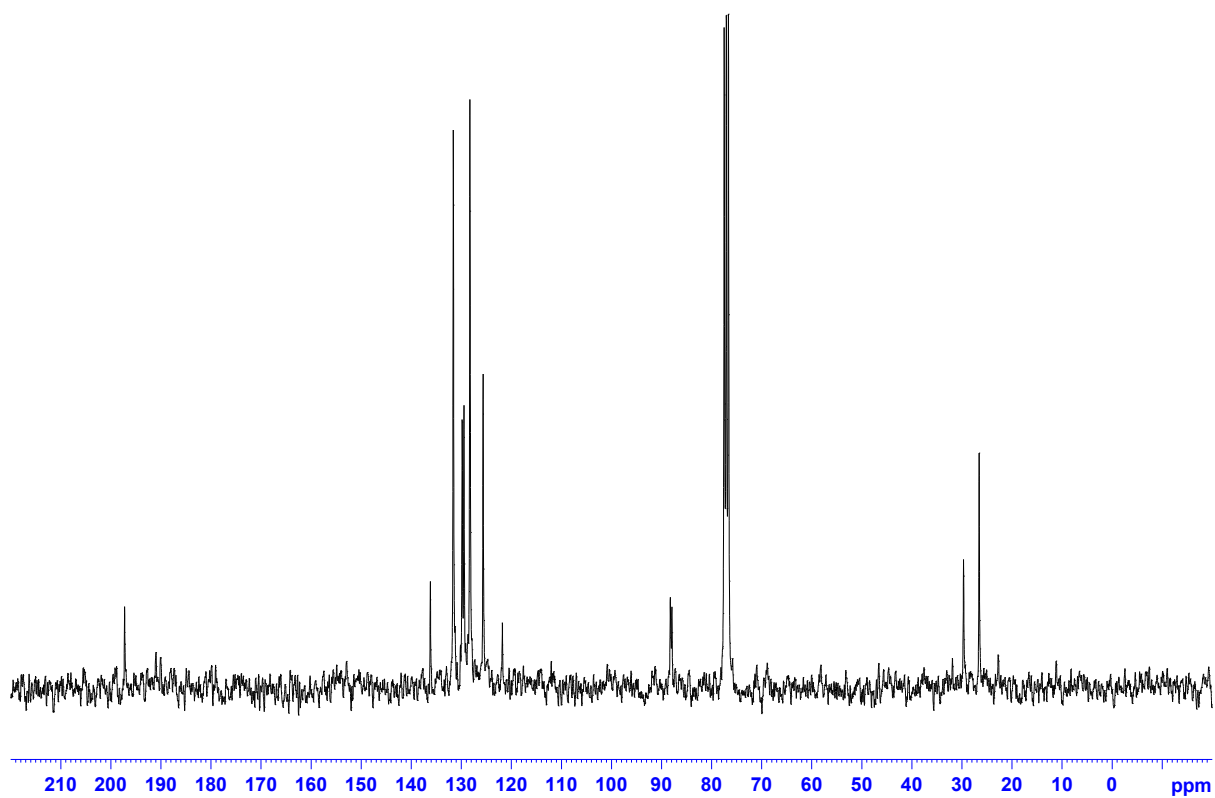

**Figure S6.** The  $^1\text{H}$  (top, 300 MHz) and  $^{13}\text{C}\{^1\text{H}\}$  (bottom, 75 MHz) NMR spectra of 3-(4-acetylphenylethynyl)thiophene (**9e**) in  $\text{CDCl}_3$  at room temperature

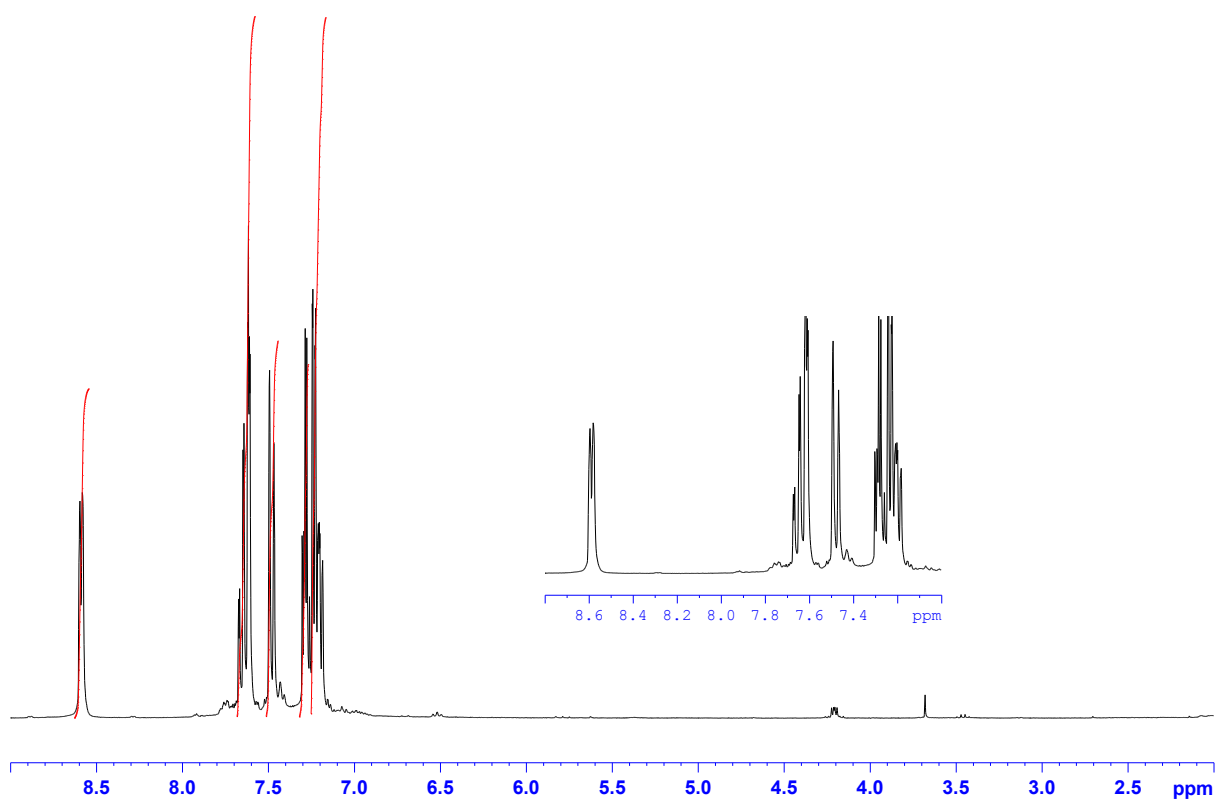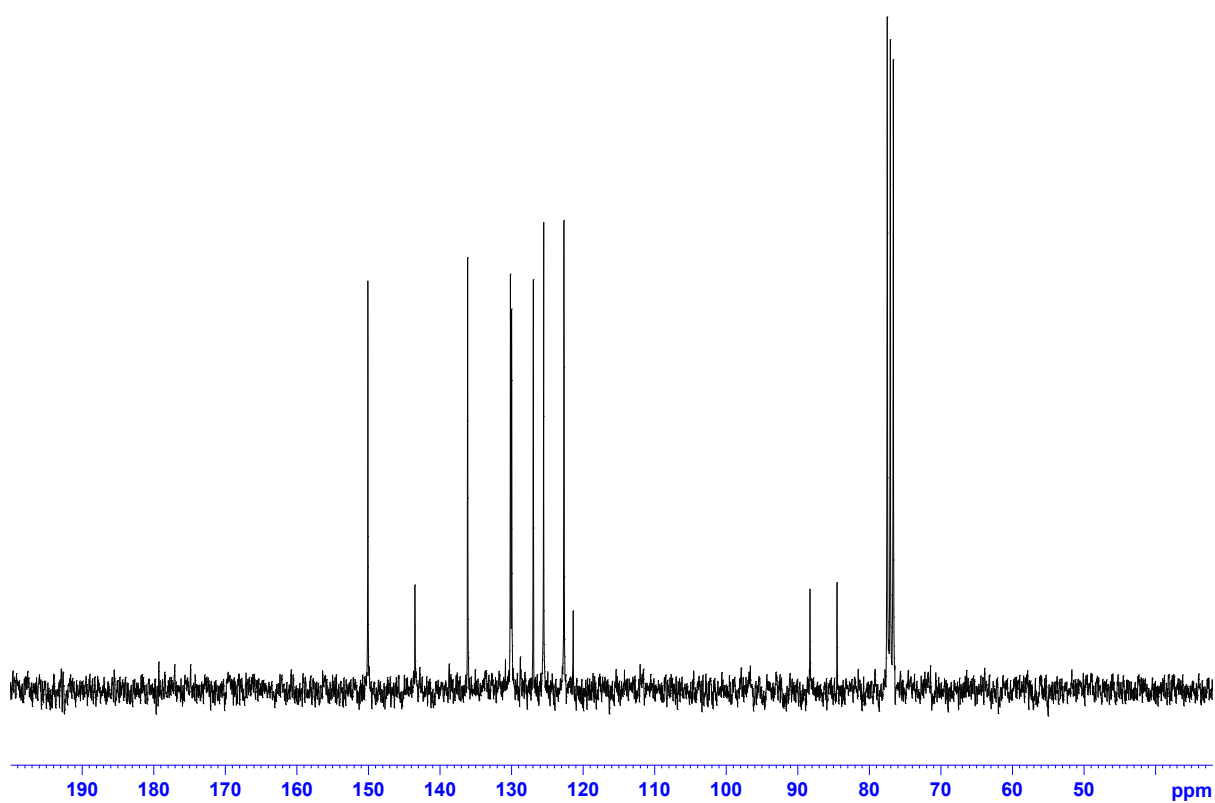

**Figure S7.** The  $^1\text{H}$  (top, 300 MHz) and  $^{13}\text{C}\{^1\text{H}\}$  (bottom, 75 MHz) NMR spectra of 3-(2-pyridylethynyl)thiophene (**9g**) in  $\text{CDCl}_3$  at room temperature
